# Supplementary material for: Comparative transcriptomic and hormonal analyses reveal potential regulation networks of adventitious root formation in Metasequoia glyptostroboides Hu et Cheng
Source: Research Square preprint supplement (doi:10.21203/rs.3.rs-4596514/v1), 2024-07-08
Supplement: Supplementary file 1 [file 5ccd2a5ede1925988bf0e0a5.xlsx]

## Sheet: Sheet1
Quality of the transcriptome of Metasequoia glyptostroboides
Sample	Raw reads	Raw bases	Clean reads	Clean bases	Error rate (%)	Q20 (%)	Q30 (%)	GC content (%)	Total mapped	Multiple mapped	Uniquely mapped
CK8_1	60082318	9072430018	59774080	8769466610	0.0248	98.23	94.34	45.27	55333828(92.57%)	4554573(7.62%)	50779255(84.95%)
CK8_2	58119546	8776051446	57774384	8450597743	0.0257	97.86	93.43	44.78	53178728(92.05%)	2866686(4.96%)	50312042(87.08%)
CK8_3	57664460	8707333460	57361744	8446704536	0.0248	98.24	94.29	45.03	53061066(92.5%)	3151893(5.49%)	49909173(87.01%)
CK10_1	57155996	8630555396	56851942	8363762156	0.0245	98.3	94.57	45.01	52573479(92.47%)	3064712(5.39%)	49508767(87.08%)
CK10_2	56157598	8479797298	55862822	8225946595	0.0249	98.16	94.17	44.94	51601975(92.37%)	2942352(5.27%)	48659623(87.11%)
CK10_3	54395208	8213676408	54110662	7959165645	0.0252	98.06	93.92	44.8	49835785(92.1%)	2600890(4.81%)	47234895(87.29%)
CK12_1	65305512	9861132312	64905262	9527758039	0.0249	98.15	94.17	45	59959450(92.38%)	3632263(5.6%)	56327187(86.78%)
CK12_2	53578760	8090392760	53313598	7821609247	0.0248	98.24	94.33	44.97	49315718(92.5%)	3049087(5.72%)	46266631(86.78%)
CK12_3	65361464	9869581064	64952778	9537325409	0.0253	98	93.78	45.13	59959417(92.31%)	3812965(5.87%)	56146452(86.44%)
CK16_1	49398180	7459125180	49099194	7197946881	0.0258	97.85	93.29	44.87	45391609(92.45%)	2435551(4.96%)	42956058(87.49%)
CK16_2	70131470	10589851970	69828774	10290102514	0.0245	98.34	94.62	44.95	64514772(92.39%)	4078200(5.84%)	60436572(86.55%)
CK16_3	55947022	8448000322	55610250	8183099410	0.0246	98.26	94.48	44.98	51456751(92.53%)	3269546(5.88%)	48187205(86.65%)
CK20_1	58068412	8768330212	57800252	8474341705	0.0248	98.23	94.35	44.84	53401925(92.39%)	2947942(5.1%)	50453983(87.29%)
CK20_2	58827058	8882885758	58530182	8605083535	0.0249	98.16	94.19	44.95	54079930(92.4%)	3275795(5.6%)	50804135(86.8%)
CK20_3	63537498	9594162198	63192082	9281162149	0.0248	98.22	94.33	44.7	58509070(92.59%)	2973012(4.7%)	55536058(87.88%)
MG8_1	49120012	7417121812	48871938	7187278001	0.0246	98.28	94.51	45.05	45149064(92.38%)	2678993(5.48%)	42470071(86.9%)
MG8_2	56827144	8580898744	55167482	7052330992	0.0267	97.32	93.17	44.3	49156124(89.1%)	3242379(5.88%)	45913745(83.23%)
MG8_3	58709874	8865190974	58429364	8606828896	0.0249	98.15	94.17	45.11	53848855(92.16%)	3663939(6.27%)	50184916(85.89%)
MG10_1	52329230	7901713730	52093458	7656876244	0.0246	98.3	94.56	44.77	48098250(92.33%)	2698678(5.18%)	45399572(87.15%)
MG10_2	54553552	8237586352	54320766	7999361115	0.0245	98.31	94.56	44.9	50234532(92.48%)	2981073(5.49%)	47253459(86.99%)
MG10_3	55617404	8398228004	55327556	8130139634	0.0247	98.23	94.39	44.79	51112215(92.38%)	2707780(4.89%)	48404435(87.49%)
MG12_1	62748826	9475072726	62389216	9075067389	0.0249	98.19	94.29	44.97	57730219(92.53%)	3621721(5.81%)	54108498(86.73%)
MG12_2	53627786	8097795686	53360844	7765546534	0.0244	98.39	94.76	44.91	49498029(92.76%)	2834986(5.31%)	46663043(87.45%)
MG12_3	54641228	8250825428	54339608	7978760330	0.0252	98.07	93.97	44.92	50285195(92.54%)	2873572(5.29%)	47411623(87.25%)
MG16_1	55040448	8311107648	54724378	8037510329	0.0247	98.27	94.43	44.67	50671783(92.59%)	2631513(4.81%)	48040270(87.79%)
MG16_2	57240268	8643280468	56916708	8367806053	0.0246	98.27	94.5	44.82	52756590(92.69%)	2816102(4.95%)	49940488(87.74%)
MG16_3	49161246	7423348146	48896832	7193153938	0.025	98.13	94.11	44.66	45220062(92.48%)	2333811(4.77%)	42886251(87.71%)
MG20_1	55207152	8336279952	54882790	8086450953	0.025	98.12	94.08	44.83	50320178(91.69%)	2927434(5.33%)	47392744(86.35%)
MG20_2	54752716	8267660116	54443578	7998713968	0.0248	98.2	94.26	44.67	50192321(92.19%)	2861494(5.26%)	47330827(86.94%)
MG20_3	57440612	8673532412	57096700	8388980293	0.0249	98.18	94.26	44.88	52781360(92.44%)	3447756(6.04%)	49333604(86.4%)
