# Supplementary material for: Comparative transcriptomic and hormonal analyses reveal potential regulation networks of adventitious root formation in Metasequoia glyptostroboides Hu et Cheng
Source: Research Square preprint supplement (doi:10.21203/rs.3.rs-4596514/v1), 2024-07-08
Supplement: Supplementary file 2 [file 78d221e065875f3e072c5bbc.xlsx]

## Sheet: Sheet1
Candidate hub genes in MEblack, MEblue and MEturquoise module
Module	Gene id	Gene name	Connectivity	KEGG pathway
MEblue	Mgl0016480	PER39	215.158	Phenylpropanoid biosynthesis
MEblue	Mgl0017520	PER4	200.464	Phenylpropanoid biosynthesis
MEblue	Mgl0017890	PER1	131.687	Phenylpropanoid biosynthesis
MEblue	Mgl0125510	PER3	120.201	Phenylpropanoid biosynthesis
MEblue	Mgl0141010	PER39	137.275	Phenylpropanoid biosynthesis
MEblue	Mgl0178090	PER4	220.234	Phenylpropanoid biosynthesis
MEblue	Mgl0178150	PER4	192.39	Phenylpropanoid biosynthesis
MEblue	Mgl0240770	PR1	193.441	Plant hormone signal transduction;MAPK signaling pathway - plant;Plant-pathogen interaction
MEblue	Mgl0287740	XTH1	92.8482	Plant hormone signal transduction
MEblue	Mgl0289590	XTH5	126.044	Plant hormone signal transduction
MEblue	Mgl0097340	XTH34	117.565	Plant hormone signal transduction
MEblue	Mgl0116960	ASMT	116.895	Tryptophan metabolism
MEblue	Mgl0049820	CISZOG1	163.256	Zeatin biosynthesis pathway
MEturquoise	Mgl0017750	PER1	306.476	Phenylpropanoid biosynthesis
MEturquoise	Mgl0037470	PER25	301.306	Phenylpropanoid biosynthesis
MEturquoise	Mgl0271670	GLC	345.564	Phenylpropanoid biosynthesis
MEturquoise	Mgl0229440	KS1	259.034	Diterpenoid biosynthesis
MEblack	Mgl0299640	Receptor-like protein EIX2, EIX2	12.1281	Plant-pathogen interaction
MEblack	Mgl0072980	L-gulonolactone oxidase 5; GGLO5	11.1274	Ascorbate and aldarate metabolism;;Biosynthesis of cofactors
MEblack	Mgl0074800	Alpha-amylase, AMYA	10.6738	Starch and sucrose metabolism
MEblack	Mgl0060640	Glutathione S-transferase U7, GSTU7	8.45082	Glutathione metabolism
MEblack	Mgl0231410	Endochitinase 4, CHI4	6.96969	Amino sugar and nucleotide sugar metabolism
MEblack	Mgl0145540	Xanthotoxin 5-hydroxylase CYP82C4, C82C4	5.21765	Isoflavonoid biosynthesis
